# Supplementary material
Source: Royal Society of Chemistry journal article supplement (doi:10.1039/d6fo00826g)
Supplement: d6fo00826g1.pdf [file d6fo00826g1.pdf]

The Supporting Information includes following items:

Figure S1. Construction of inflammation models.

Figure S2. Selection of POA intervention concentration.

Figure S3. Selection of POA intervention targets.

Figure S4. Staining of nuclear and mitochondrial superoxide.

Figure S5. Staining of cell membrane and lysosome.

Figure S6. Expression of iNOS protein.

Figure S7. Expression of NRF2 protein.

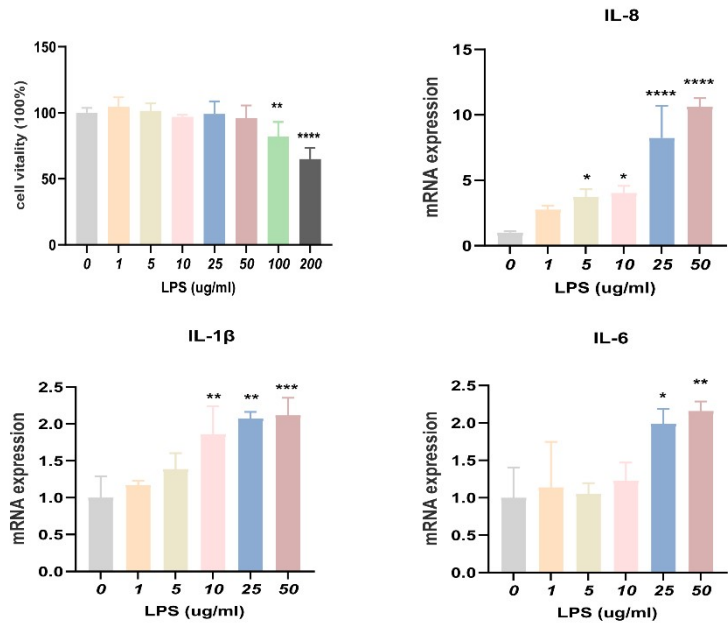

Figure S1. Construction of inflammation models.

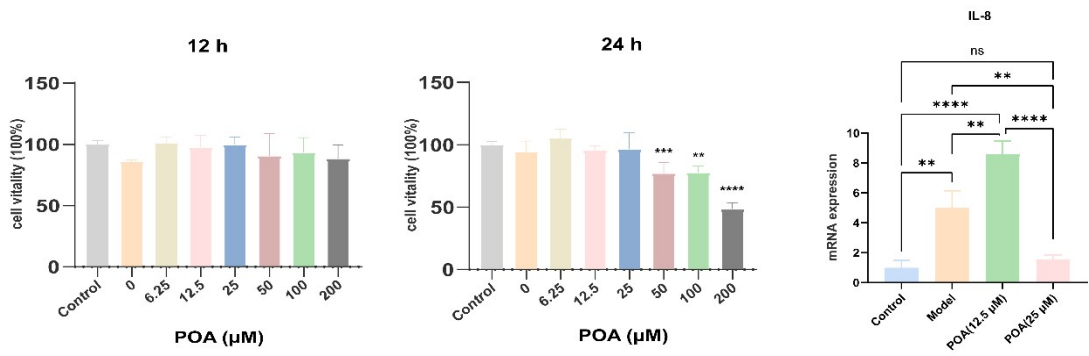

Figure S2. Selection of POA intervention concentration.

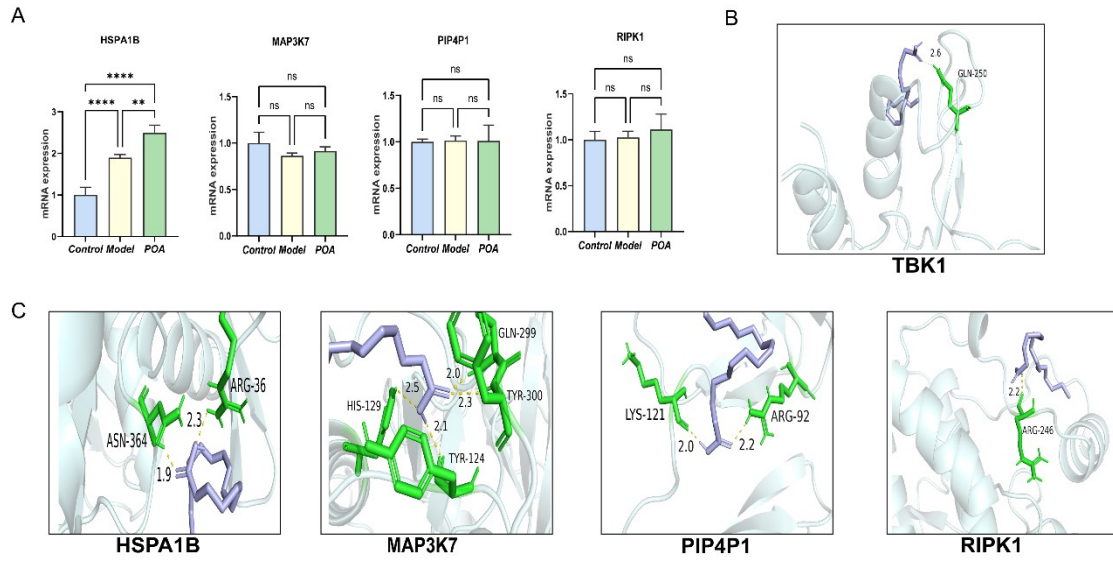

Figure S3. Selection of POA intervention targets.

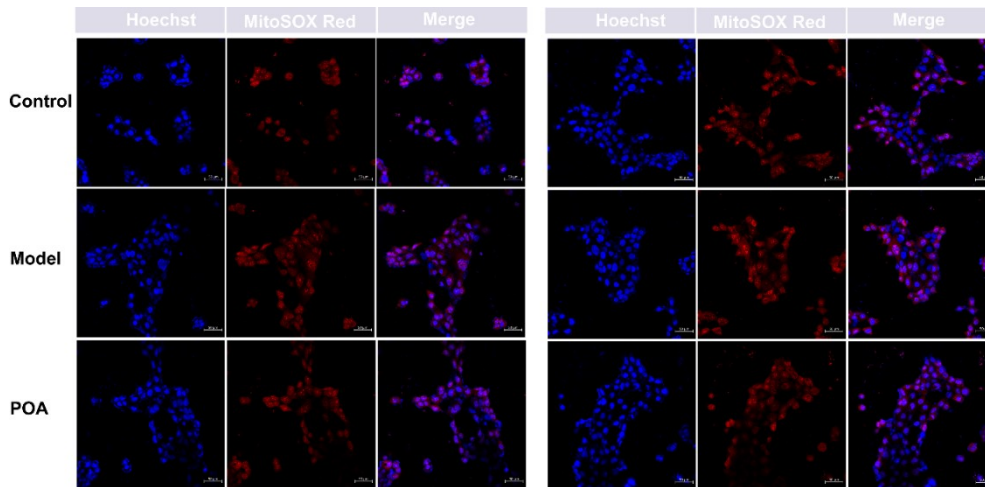

Figure S4. Staining of nuclear and mitochondrial superoxide.

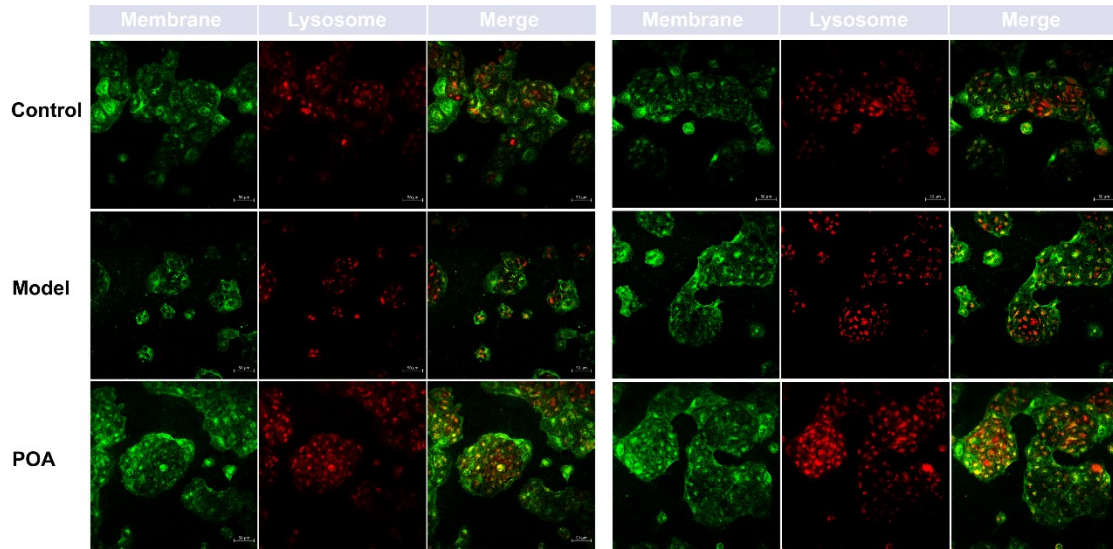

Figure S5. Staining of cell membrane and lysosome.

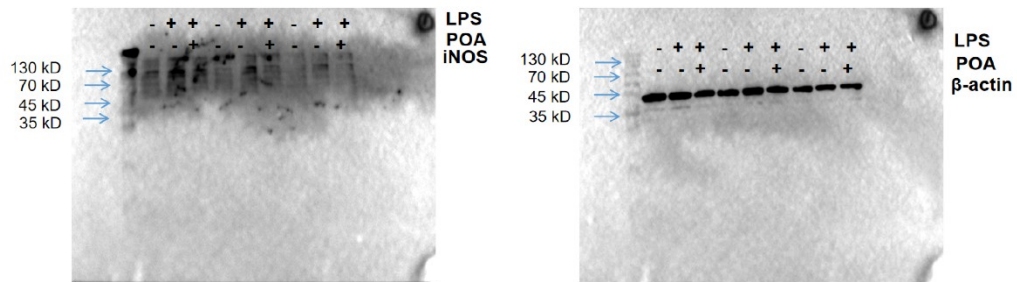

Figure S6. Expression of iNOS protein.

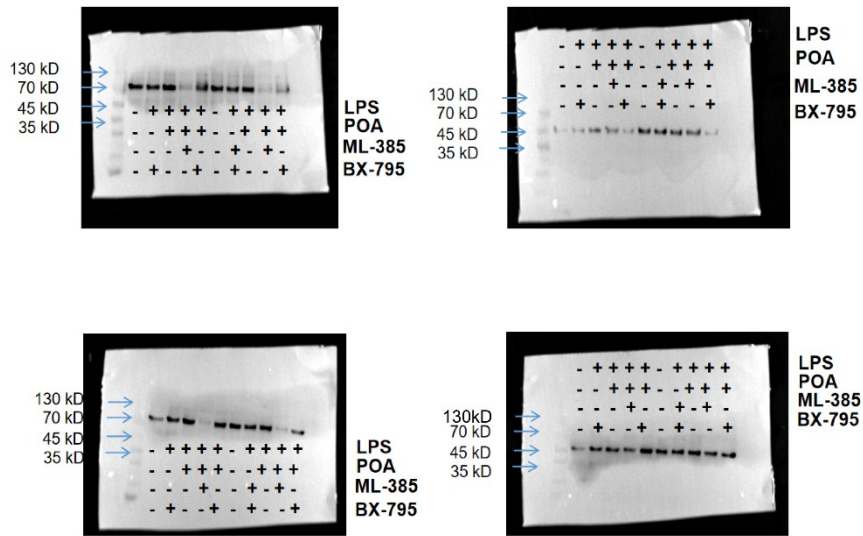

Figure S7. Expression of NRF2 protein.
